# Supplementary material for: Edible Far Eastern Ferns as a Dietary Source of Long-Chain Polyunsaturated Fatty Acids
Source: MDPI journal article supplement (doi:10.3390/foods10061220), 2021-05-28
Supplement: s1 [file s1]

## **Supplementary Materials**

### **Edible Far Eastern ferns as a dietary source of long-chain polyunsaturated fatty acids**

Eduard V. Nekrasov, Vasily I. Svetashev

Table S1. Total lipids (TL, % of wet weight) and fatty acid content (% of sum) in the raw fiddleheads of edible ferns from the Russian Far East.

Table S2. Fatty acid content (mg/100 g wet weight) of raw fiddleheads of edible ferns from Amur Oblast, Russia.

**Table S1.** Total lipids (TL, % of wet weight) and fatty acid content (% of sum) in the raw fiddleheads of edible ferns from the Russian Far East.

|                    | <i>Pteridium aquilinum</i> |                |              | <i>Matteuccia struthiopteris</i> |                |              | <i>Osmundastrum asiaticum</i> |                |              | Interspecies differences,<br>P-value |                   |                   |
|--------------------|----------------------------|----------------|--------------|----------------------------------|----------------|--------------|-------------------------------|----------------|--------------|--------------------------------------|-------------------|-------------------|
|                    | Primorsky<br>Krai          | Amur<br>Oblast | P-value      | Primorsky<br>Krai                | Amur<br>Oblast | P-value      | Primorsky<br>Krai             | Amur<br>Oblast | P-value      | M.s. vs.<br>O.a.                     | M.s. vs.<br>Pt.a. | Pt.a. vs.<br>O.a. |
| Total lipids, %    | 1.02±0.07                  | 1.23±0.10      | <b>0.049</b> | 0.85±0.12                        | 0.99±0.14      | 0.271        | 0.80±0.09                     | 0.92±0.06      | 0.110        | 0.401                                | <b>0.027</b>      | <b>0.004</b>      |
| Fatty acid, %      |                            |                |              |                                  |                |              |                               |                |              |                                      |                   |                   |
| 14:0               | 0.3±0.1                    | 0.3±0.1        | 0.907        | 0.3±0.1                          | 0.3±0.0        | 0.603        | 0.1±0.0                       | 0.1±0.0        | 0.844        | <b>0.001</b>                         | 0.845             | <b>0.000</b>      |
| 14:1n-5            | 0.2±0.0                    | 0.1±0.0        | 0.060        | 0.1±0.0                          | 0.2±0.0        | <b>0.013</b> | 0.2±0.0                       | 0.1±0.0        | <b>0.018</b> | 0.337                                | 0.991             | 0.204             |
| 15:0               | 0.1±0.0                    | 0.1±0.0        | 0.623        | 0.3±0.0                          | 0.2±0.0        | <b>0.019</b> | 0.1±0.0                       | 0.1±0.0        | 0.494        | <b>0.001</b>                         | <b>0.001</b>      | <b>0.003</b>      |
| 16:0               | 26.3±0.9                   | 25.0±0.8       | 0.133        | 26.6±0.6                         | 26.6±1.0       | 0.927        | 30.0±0.3                      | 25.3±0.5       | <b>0.000</b> | 0.384                                | 0.117             | 0.131             |
| 16:1n-9            | 0.1±0.0                    | 0.1±0.0        | <b>0.032</b> | 0.5±0.0                          | 0.8±0.0        | <b>0.000</b> | 0.2±0.0                       | 0.1±0.0        | <b>0.035</b> | <b>0.001</b>                         | <b>0.001</b>      | 0.078             |
| 16:1n-7            | 0.2±0.0                    | 0.3±0.1        | 0.097        | 0.9±0.0                          | 1.2±0.1        | <b>0.013</b> | 0.2±0.0                       | 0.2±0.0        | 0.165        | <b>0.000</b>                         | <b>0.000</b>      | 0.224             |
| 16:1n-5            | n.d.                       | 0.1±0.0        |              | n.d.                             | 0.2±0.1        |              | n.d.                          | 0.2±0.0        |              |                                      |                   |                   |
| <i>t</i> -16:1n-13 | 0.1±0.1                    | 0.2±0.1        | 0.595        | 0.2±0.0                          | 0.3±0.1        | 0.139        | 0.2±0.1                       | 0.1±0.0        | <b>0.028</b> | 0.093                                | 0.062             | 0.868             |
| 16:2n-6            | 0.1±0.1                    | 0.1±0.1        | 0.746        | 0.2±0.1                          | 0.3±0.0        | 0.061        | 0.1±0.1                       | 0.1±0.0        | 0.479        | <b>0.035</b>                         | <b>0.040</b>      | 0.815             |
| 16:3n-3            | 1.7±0.2                    | 1.9±0.6        | 0.693        | 1.3±0.1                          | 1.7±0.4        | 0.310        | 2.5±0.3                       | 2.8±0.2        | 0.141        | <b>0.000</b>                         | 0.167             | <b>0.004</b>      |
| 17:0               | 0.1±0.0                    | 0.1±0.0        | 0.064        | 0.1±0.0                          | 0.2±0.0        | 0.068        | 0.1±0.0                       | 0.1±0.0        | 0.180        | 0.064                                | <b>0.021</b>      | 0.205             |
| 18:0               | 1.7±0.0                    | 2.0±0.2        | 0.076        | 1.0±0.0                          | 1.5±0.1        | <b>0.001</b> | 1.6±0.5                       | 1.2±0.0        | 0.273        | 0.697                                | <b>0.002</b>      | <b>0.015</b>      |
| 18:1n-9            | 5.0±0.2                    | 5.9±0.4        | 0.059        | 5.5±0.3                          | 10.0±0.1       | <b>0.001</b> | 5.9±0.5                       | 5.8±0.2        | 0.814        | 0.120                                | 0.072             | 0.167             |
| 18:1n-7            | 0.6±0.0                    | 0.9±0.2        | 0.117        | 1.5±0.0                          | 1.6±0.2        | 0.485        | 1.0±0.1                       | 1.0±0.3        | 0.949        | <b>0.000</b>                         | <b>0.000</b>      | 0.055             |
| 18:1n-5            | 0.1±0.0                    | 0.1±0.0        | 0.930        | 0.2±0.0                          | 0.1±0.0        | <b>0.002</b> | 0.3±0.1                       | 0.3±0.0        | 0.964        | <b>0.011</b>                         | 0.243             | <b>0.000</b>      |
| 18:2n-6            | 27.0±0.4                   | 25.1±0.8       | <b>0.039</b> | 20.9±0.5                         | 19.9±0.7       | 0.143        | 18.0±1.6                      | 17.0±1.0       | 0.414        | <b>0.002</b>                         | <b>0.000</b>      | <b>0.000</b>      |
| 18:3n-6            | 0.9±0.0                    | 2.5±0.1        | <b>0.002</b> | 1.7±0.1                          | 2.7±0.1        | <b>0.001</b> | 2.2±0.3                       | 2.4±0.1        | 0.408        | 0.699                                | 0.258             | 0.154             |
| 18:3n-3            | 10.8±0.6                   | 12.8±1.3       | 0.094        | 16.9±0.1                         | 14.4±1.1       | 0.062        | 22.0±1.3                      | 24.0±1.2       | 0.119        | <b>0.000</b>                         | <b>0.001</b>      | <b>0.000</b>      |
| 18:4n-3            | 0.1±0.1                    | 0.2±0.0        | 0.123        | 0.1±0.0                          | 0.2±0.0        | <b>0.048</b> | 0.5±0.1                       | 0.6±0.1        | 0.679        | <b>0.000</b>                         | 0.972             | <b>0.000</b>      |
| 20:0               | 1.4±0.1                    | 1.5±0.2        | 0.490        | 0.3±0.0                          | 0.4±0.0        | <b>0.015</b> | 0.5±0.2                       | 0.4±0.0        | 0.428        | 0.527                                | <b>0.000</b>      | <b>0.000</b>      |
| 20:1n-9            | 0.1±0.0                    | 0.1±0.0        | 0.080        | 0.2±0.0                          | 0.2±0.0        | <b>0.023</b> | 0.1±0.0                       | 0.1±0.0        | 0.306        | <b>0.000</b>                         | <b>0.000</b>      | 0.761             |
| 20:2n-6            | 0.2±0.0                    | 0.1±0.0        | 0.167        | 0.3±0.0                          | 0.1±0.0        | <b>0.001</b> | 0.2±0.0                       | 0.2±0.0        | 0.157        | 0.895                                | 0.182             | 0.104             |
| 5,11,14-20:3       | 0.5±0.0                    | 0.4±0.0        | <b>0.009</b> | 0.2±0.0                          | 0.2±0.0        | <b>0.006</b> | 0.5±0.0                       | 0.8±0.1        | <b>0.021</b> | <b>0.001</b>                         | <b>0.002</b>      | <b>0.017</b>      |

**Table S1. Cont.**

|                 | <i>Pteridium aquilinum</i> |                |              | <i>Matteuccia struthiopteris</i> |                |              | <i>Osmundastrum asiaticum</i> |                |              | Interspecies differences,<br>P-value |                   |                   |
|-----------------|----------------------------|----------------|--------------|----------------------------------|----------------|--------------|-------------------------------|----------------|--------------|--------------------------------------|-------------------|-------------------|
|                 | Primorsky<br>Krai          | Amur<br>Oblast | P-value      | Primorsky<br>Krai                | Amur<br>Oblast | P-value      | Primorsky<br>Krai             | Amur<br>Oblast | P-value      | M.s. vs.<br>O.a.                     | M.s. vs.<br>Pt.a. | Pt.a. vs.<br>O.a. |
| Fatty acid, %   |                            |                |              |                                  |                |              |                               |                |              |                                      |                   |                   |
| 20:3n-6         | 1.3±0.1                    | 1.5±0.4        | 0.447        | 2.6±0.2                          | 1.8±0.1        | <b>0.018</b> | 0.9±0.1                       | 1.3±0.1        | <b>0.022</b> | <b>0.001</b>                         | <b>0.005</b>      | 0.061             |
| 20:4n-6 (ARA)   | 13.5±0.4                   | 11.8±0.4       | <b>0.006</b> | 12.8±0.5                         | 9.3±0.1        | <b>0.006</b> | 6.4±0.5                       | 8.8±0.2        | <b>0.005</b> | <b>0.007</b>                         | 0.114             | <b>0.000</b>      |
| 20:3n-3         | n.d.                       | 0.03±0.00      |              | n.d.                             | 0.05±0.01      |              | n.d.                          | 0.1±0.0        |              |                                      |                   |                   |
| 5,11,14,17-20:4 | 0.1±0.0                    | 0.1±0.0        | 0.623        | 0.2±0.0                          | 0.2±0.0        | 0.530        | 0.4±0.0                       | 0.5±0.0        | 0.077        | <b>0.000</b>                         | <b>0.000</b>      | <b>0.000</b>      |
| 20:4n-3         | 0.1±0.0                    | 0.1±0.0        | 0.193        | 0.2±0.0                          | 0.1±0.0        | 0.454        | 0.2±0.0                       | 0.3±0.0        | <b>0.018</b> | <b>0.002</b>                         | <b>0.001</b>      | <b>0.000</b>      |
| 20:5n-3 (EPA)   | 0.8±0.0                    | 1.0±0.2        | 0.142        | 2.3±0.2                          | 2.3±0.2        | 0.766        | 2.9±0.2                       | 3.2±0.3        | 0.157        | <b>0.001</b>                         | <b>0.000</b>      | <b>0.000</b>      |
| 22:0            | 2.5±0.4                    | 2.1±0.2        | 0.276        | 0.6±0.1                          | 0.8±0.1        | <b>0.010</b> | 0.9±0.1                       | 1.2±0.0        | <b>0.043</b> | <b>0.002</b>                         | <b>0.000</b>      | <b>0.000</b>      |
| 23:0            | 0.2±0.0                    | 0.1±0.1        | 0.125        | 0.1±0.0                          | 0.1±0.1        | 0.712        | 0.2±0.0                       | n.d.           |              |                                      | 0.354             |                   |
| 24:0            | 3.2±0.7                    | 2.7±0.2        | 0.393        | 1.5±0.3                          | 1.5±0.1        | 0.821        | 1.3±0.1                       | 1.4±0.0        | 0.149        | 0.136                                | <b>0.001</b>      | <b>0.001</b>      |
| 26:0            | 0.6±0.2                    | 0.5±0.0        | 0.583        | 0.5±0.2                          | 0.4±0.1        | 0.856        | 0.3±0.1                       | 0.3±0.1        | 0.496        | <b>0.027</b>                         | 0.107             | <b>0.001</b>      |
| SFA             | 36.5±0.7                   | 34.5±1.6       | 0.155        | 31.3±0.9                         | 32.2±1.2       | 0.381        | 35.1±0.5                      | 30.0±0.6       | <b>0.000</b> | 0.525                                | <b>0.001</b>      | 0.055             |
| MUFA            | 6.4±0.1                    | 7.8±0.3        | <b>0.007</b> | 9.1±0.3                          | 14.6±0.2       | <b>0.000</b> | 8.1±0.4                       | 7.9±0.2        | 0.466        | <b>0.026</b>                         | <b>0.011</b>      | <b>0.041</b>      |
| PUFA            | 57.1±0.6                   | 57.7±1.3       | 0.544        | 59.6±1.0                         | 53.3±1.4       | <b>0.005</b> | 56.8±0.9                      | 62.1±0.8       | <b>0.002</b> | 0.150                                | 0.569             | 0.154             |
| n-6             | 43.5±0.3                   | 41.5±0.8       | <b>0.037</b> | 38.7±1.1                         | 34.3±0.5       | <b>0.013</b> | 28.3±0.8                      | 30.6±1.4       | 0.085        | <b>0.000</b>                         | <b>0.001</b>      | <b>0.000</b>      |
| n-3             | 13.6±0.8                   | 16.1±1.9       | 0.136        | 20.9±0.2                         | 18.9±1.8       | 0.198        | 28.5±1.6                      | 31.4±1.5       | 0.085        | <b>0.000</b>                         | <b>0.001</b>      | <b>0.000</b>      |
| ARA/EPA         | 17.0                       | 11.3           |              | 5.6                              | 3.9            |              | 2.2                           | 2.8            |              |                                      |                   |                   |
| (n-6)/(n-3)     | 3.2                        | 2.6            |              | 1.8                              | 1.8            |              | 1.0                           | 1.0            |              |                                      |                   |                   |

Abbreviations: ARA – arachidonic acid, EPA – eicosapentaenoic acid, M.s. – *Matteuccia struthiopteris*, MUFA – monounsaturated fatty acids, n.d. – not determined, O.a. – *Osmundastrum asiaticum*, Pt.a. – *Pteridium aquilinum*, PUFA – polyunsaturated fatty acids, SFA – saturated fatty acids.

Notes: Values are means of three samples ± standard deviations. P-values for difference between samples from the two regions are given next to the corresponding values. P-values for difference between species were calculated using the samples from the both regions. Statistically significant samples are highlighted in bold.

**Table S2.** Fatty acid content (mg/100 g wet weight) of raw fiddleheads of edible ferns from Amur Oblast, Russia.

| Fatty acid         | <i>Pteridium aquilinum</i> | <i>Matteuccia struthiopteris</i> | <i>Osmundastrum asiaticum</i> |
|--------------------|----------------------------|----------------------------------|-------------------------------|
| 14:0               | 2.1±0.5                    | 1.5±0.2                          | 0.6±0.0                       |
| 14:1n-5            | 0.8±0.2                    | 0.8±0.1                          | 0.4±0.0                       |
| 15:0               | 0.7±0.0                    | 0.8±0.0                          | 0.4±0.1                       |
| 16:0               | 160.6±10.2                 | 116.9±13.8                       | 114.9±3.9                     |
| 16:1n-9            | 1.0±0.1                    | 3.4±0.5                          | 0.6±0.0                       |
| 16:1n-7            | 1.8±0.3                    | 5.1±0.5                          | 0.8±0.1                       |
| 16:1n-5            | 0.4±0.1                    | 0.9±0.6                          | 0.9±0.1                       |
| <i>t</i> -16:1n-13 | 1.1±0.4                    | 1.4±0.8                          | 0.3±0.0                       |
| 16:2n-6            | 0.8±0.3                    | 1.4±0.2                          | 0.5±0.0                       |
| 17:0               | 0.9±0.1                    | 0.7±0.0                          | 0.7±0.0                       |
| 16:3n-3            | 13.2±2.7                   | 9.5±3.7                          | 12.8±1.4                      |
| 18:0               | 12.8±0.5                   | 6.8±1.0                          | 5.3±0.3                       |
| 18:1n-9            | 38.1±4.0                   | 45.0±5.8                         | 26.4±2.0                      |
| 18:1n-7            | 5.7±1.0                    | 6.9±0.5                          | 4.5±1.2                       |
| 18:1n-5            | 0.7±0.2                    | 0.3±0.2                          | 1.3±0.1                       |
| 18:2n-6            | 168.3±18.9                 | 99.8±6.9                         | 77.2±5.9                      |
| 18:3n-6            | 16.9±1.0                   | 14.5±1.8                         | 10.9±0.8                      |
| 18:3n-3            | 86.7±7.1                   | 78.5±12.9                        | 109.1±8.7                     |
| 18:4n-3            | 1.3±0.1                    | 1.0±0.1                          | 2.5±0.3                       |
| 20:0               | 9.2±1.7                    | 1.9±0.3                          | 1.6±0.0                       |
| 20:1n-9            | 0.9±0.3                    | 1.1±0.2                          | 0.6±0.2                       |
| 20:2n-6            | 0.9±0.1                    | 0.7±0.1                          | 1.0±0.1                       |
| 5,11,14-20:3       | 2.3±0.2                    | 1.0±0.1                          | 3.6±0.3                       |
| 20:3n-6            | 10.8±3.9                   | 9.8±0.6                          | 5.9±0.7                       |
| 20:4n-6 (ARA)      | 80.1±6.5                   | 52.5±3.3                         | 40.2±2.8                      |
| 20:3n-3            | 0.2±0.0                    | 0.3±0.1                          | 0.4±0.0                       |
| 5,11,14,17-20:4    | 0.6±0.1                    | 1.0±0.1                          | 2.2±0.1                       |
| 20:4n-3            | 0.8±0.2                    | 0.8±0.1                          | 1.4±0.1                       |
| 20:5n-3 (EPA)      | 7.1±0.8                    | 14.1±1.9                         | 14.5±1.8                      |
| 22:0               | 13.3±1.7                   | 3.8±0.3                          | 5.3±0.4                       |
| 24:0               | 17.7±3.1                   | 6.9±0.5                          | 6.3±0.3                       |
| 26:0               | 3.4±0.5                    | 2.2±0.3                          | 1.3±0.2                       |
| SFA                | 233.0±15.4                 | 150.5±20.0                       | 148.6±5.9                     |
| MUFA               | 50.4±3.7                   | 65.0±8.9                         | 35.8±1.0                      |
| PUFA               | 377.8±31.5                 | 275.9±27.9                       | 270.0±16.9                    |
| n-6                | 280.2±28.6                 | 179.5±12.7                       | 139.2±10.0                    |
| n-3                | 97.5±6.3                   | 96.4±15.2                        | 130.8±11.0                    |
| Total              | 661.2±49.7                 | 491.4±56.8                       | 454.3±23.8                    |

Note: Values are means of three samples ± standard deviations. See Suppl. Table 1 for abbreviations.
